# Supplementary material for: Unmanned High-Speed Aerial Vehicles in Medical Logistics: A Comprehensive Comparative Analysis of Blood Sample Transportation with Weather Variability
Source: Preprints.org preprint supplement (doi:10.20944/preprints202408.0887.v1), 2024-08-13
Supplement: Supplementary file 1 [file supplementary]

## Sheet: Serum compared to neg. control
Drone							Bland-Altman		Car				Bland-Altman
Analyte	Unit	n	Mean	Slope	r	Intercept	Arithmetic mean %		Analyte	Slope	r	Intercept	Arithmetic mean %
Alk. Phos.	U/L	20	77.8	1	0.97	1.5	1.6		Alk. Phos.	1	0.969	1	1.5
Billirubin total	umol/L	20	3.88	0.7	0.864	0.14	-32.7		Billirubin total	0.875	0.881	0.175	-7.6
Calcium	mmol/L	20	2.4	0.833	0.774	0.3183	-3.9		Calcium	0.857	0.844	0.255	-3.8
Cholesterol	mmol/L	20	5.07	1	0.993	1	-0.6		Cholesterol	1	0.993	0	-0.4
Creatine kinase	U/L	20	92.75	0.958	0.992	2.271	-1.3		Creatine kinase	1	0.991	-1	-0.9
CRP	mg/L	20	4.08	1.063	0.998	-0.172	-1.1		CRP	1.078	0.998	-0.185	-0.8
Protein total	g/L	20	68.6	0.966	0.934	2.966	1.1		Protein total	0.96	0.891	3.44	1.2
Ferritin	ng/mL	20	189.8	0.854	0.998	-0.311	-15.7		Ferritin	0.881	0.997	-3.041	-11.5
Folate	nmol/L	20	19.8	1.02	0.985	0.387	2.1		Folate	0.969	0.993	0.367	0.8
ƴGT	U/L	20	29.9	1.107	0.993	-0.167	9.5		ƴGT	1.111	0.995	-0.055	10.2
Glucose	mmol/L	20	5.69	1	0.987	0	-0.2		Glucose	1	0.997	0	-0.4
AST	U/L	20	24.55	0.8	0.964	6.6	6.8		AST	0.8	0.966	6.6	7.6
ALT	U/L	20	23.65	1	0.986	-2	-8		ALT	1	0.99	-2	-7.8
HDL	mmol/L	20	1.51	1	0.998	0.01	0.3		HDL	0.983	0.996	0.023	0
Uric acid	umol/L	20	289.9	1.056	0.997	-15.41	0.5		Uric acid	1.076	0.994	-19.88	0.3
Potassium	mmol/L	20	4.635	13.66	0.274	-57.1	-10.9		Potassium	15.33	0.26	-64.35	-11.2
Creatinine	umol/L	20	81.45	1	0.868	0	-1.7		Creatinine	0.973	0.887	2.078	-0.7
LDH	U/L	20	148.8	1	0.987	-1	-0.5		LDH	1.018	0.985	-3.767	-0.5
LDL Cholesterol	mmol/L	20	2.91	1	0.992	0.01	0.4		LDL Cholesterol	1	0.998	0.01	0.2
Lipase	U/L	20	40.85	0.925	0.996	0.833	-5		Lipase	0.924	0.992	0.848	-5.8
Sodium	mmol/l	20	114.5	0.006	0.334	138	33.1		Sodium	0	0.257	139	33.3
HDL Cholest.	mmol/l	20	1.51	1	0.998	0.01	0.3		HDL Cholest.	0.983	0.996	0.023	0
Non - HDL Chol	mmol/l	20	3.55	1	0.995	-0.01	-1		Non - HDL Chol	0.99	0.988	0.026	-0.6
Phosphate	mmol/l	20	1.11	1.045	0.978	-0.037	1		Phosphate	1.045	0.977	-0.049	0.4
Triglyceride	mmol/l	20	1.5	1.012	0.995	0.031	3.6		Triglyceride	1.02	0.992	0.017	3.3
Vitamine B12	pmol/L	20	361.2	0.967	0.971	5.8	-1.1		Vitamine B12	0.944	0.98	10.4	-2.6
TSH	mU/L	20	2.05	0.913	0.996	-0.23	-10.4		TSH	0.908	0.997	-0.004	-9.7
Highest value				13.66	0.998	138	33.1			15.33	0.998	139	33.3
Lowest Value				0.006	0.274	-57.1	-32.7			0	0.257	-64.35	-11.5

## Sheet: Serum Drone compared to Car 
							Bland-Altman
Analyte	Unit	n	Mean	Slope	r	Intercept	Arithmetic mean %
Alk. Phos.	U/L	20	77.85	1	0.984	0	-0.1005
Billirubin total	umol/L	20	3.533	1	0.867	0.8	-5.789
Calcium	mmol/L	20	2.41	1	0.934	0	-0.05
Cholesterol	mmol/L	20	5.06	1	0.991	0	-0.2
Creatine kinase	U/L	20	92.3	1.009	0.997	-0.595	-0.5
CRP	mg/L	20	4.04	1.01	0.997	-0.4131	-0.4
Protein total	g/L	20	68.5	1	0.845	0	-0.2
Ferritin	ng/mL	20	188.46	1.0229	0.998	-2.6675	-0.4
Folate	nmol/L	20	20.194	0.9742	0.978	0.231	0.9
ƴGT	U/L	20	29.7	1	0.995	0	-0.8
Glucose	mmol/L	20	5.705	1	0.989	0	0.2
AST	U/L	20	24.4	1	0.961	0	-0.9
ALT	U/L	20	23.65	1	0.975	0	-0.3
HDL	mmol/L	20	1.52	1	0.991	-0.005	0.4
Uric acid	umol/L	20	290.4	1.018	0.994	-5.0408	0.2
Potassium	mmol/L	20	4.65	1	0.993	0	0.3
Creatinine	umol/L	20	80.65	0.9474	0.908	4.289	-1.1
LDH	U/L	20	148.85	1	0.997	-0.5	0
LDL Cholesterol	mmol/L	20	2.9255	0.9877	0.995	0.02463	0.2
Lipase	U/L	20	41.2	1	0.997	-0.5	0.8
Sodium	mmol/l	20	138.8	1	0.83	0	0.22
HDL Cholest.	mmol/l	20	1.524	1	0.991	-0.005	0.4
Non - HDL Chol	mmol/l	20	3.536	0.9892	0.989	0.04956	-0.5
Phosphate	mmol/l	20	1.123	1	0.97	-0.01	0.6
Triglyceride	mmol/l	20	1.5065	1	0.994	0	0.3
Vitamine B12	pmol/L	20	366.84	1.0047	0.965	-10.3318	1.5
TSH	mU/L	20	2.044	1	0.998	0.01	-0.7
Highest value				1.0229	0.998	4.289	1.5
Lowest Value				0.9474	0.83	-10.3318	-5.789

## Sheet: EDTA d to neg. control
Drone							Bland-Altman		Car				Bland-Altman
Analyte	Unit	n	Mean	Slope	r	Intercept	Arithmetic mean %		Analyte	Slope	r	Intercept	Arithmetic mean %
Hemoglobin	g/L	20	140.3	1.051	0.986	-9.184	-1.1		Hemoglobin	1	0.986	-1.5	-0.4
Hematocrit	%	20	40.1	1.033	0.987	-0.266	3.1		Hematocrit	1	0.979	1	4
Erythrocytes	x 10´`6/ul	20	4.525	1	0.993	0.1	2.2		Erythrocytes	1	0.995	0.1	3.4
RDW-CV	%	20	13.16	1	0.985	-0.1	-0.72		RDW-CV	1	0.991	-0.1	-0.66
MCV	fl	20	89	1	0.983	0.5	0.57		MCV	1	0.988	1	0.73
MCH	pg	20	31.3	1	0.901	-1	-3.6		MCH	1	0.931	-1	-4.1
MCHC	g/L	20	351.1	1	0.829	-16	-4		MCHC	1	0.863	-16	-4.6
PDW	fl	20	12.37	0.881	0.729	1.822	5		PDW	1.153	0.831	-1.18	4.7
MPV	fl	20	10.5	1	0.961	0.3	3.2		MPV	1.14	0.938	-1.17	2.9
Leukocytes	x 10´`3/ul	20	6.77	0.958	0.973	0.414	2.5		Leukocytes	0.975	0.985	0.282	1.9
Eosinophils	%	20	3	1	0.973	0	0.15		Eosinophils	1	0.967	0.15	-0.03
Eosinophils	x 10´`3/ul	20	0.19	1	0.964	0	1.1		Eosinophils	1	0.983	0	0.01
Basophils	%	20	0.69	1	0.917	0	0.04		Basophils	1	0.969	0	0.05
Monocytes	%	20	9.17	0.964	0.912	0.156	-2.1		Monocytes	1	0.957	0	-0.5
Monocytes	x 10´`3/ul	20	0.67	1	0.939	0	-1.1		Monocytes	1	0.959	0	-2.4
Thrombocytes	x 10´`3/ul	20	218	1.15	0.938	-14.58	10.23		Thrombocytes	1.18	0.925	-26.13	5.8
Lymphocytes	%	20	31	0.983	0.995	0.953	1.5		Lymphocytes	0.947	0.994	1.569	0.2
Lymphocytes	x 10´`3/ul	20	1.98	1	0.994	0.1	3.9		Lymphocytes	1	0.997	0	1.4
Neutrophils	%	20	56.73	1.005	0.995	-0.512	-0.7		Neutrophils	0.961	0.995	2.182	0.3
Neutrophils	x 10´`3/ul	20	3.95	0.956	0.978	0.2	0.04		Neutrophils	0.968	0.995	0.165	0.04
Highest value				1.15	0.995	1.822	10.23			1.18	0.997	2.182	5.8
Lowest Value				0.881	0.729	-16	-4			0.947	0.831	-26.13	-4.6

## Sheet: EDTA Drone compared to Car
							Bland-Altman
Analyte	Unit	n	Mean	Slope	r	Intercept	Arithmetic mean %
Hemoglobin	g/L	20	139.35	1	0.994	1	-0.7
Hematocrit	%	20	39.8	1	0.992	0	-0.8
Erythrocytes	x 10´`6/ul	20	4.475	1	0.999	0.1	-1.1
RDW-CV	%	20	13.15	1	0.987	0	-0.07
MCV	fl	20	88.85	1	0.988	0	-0.16
MCH	pg	20	31.3	1	0.86	0	0.5
MCHC	g/L	20	351.55	1.0752	0.888	-28.8421	0.6
PDW	fl	20	12.39	1.1579	0.899	-2.0921	0.1
MPV	fl	20	10.5	1.125	0.951	-1.3563	0.3
Leukocytes	x 10´`3/ul	20	6.795	1.0141	0.983	-0.08873	0.5
Eosinophils	%	20	3	1	0.953	-0.1	6.9
Eosinophils	x 10´`3/ul	20	0.19	1	0.977	0	0
Basophils	%	20	0.69	1	0.923	0	-5.3
Monocytes	%	20	9.005	1.0721	0.928	-0.5753	-2
Monocytes	x 10´`3/ul	20	0.69	1	0.959	0	0.9
Thrombocytes	x 10´`3/ul	20	227.05	1.0706	0.954	-24.8529	4.3
Lymphocytes	%	20	31.045	0.9767	0.994	0.3613	1.3
Lymphocytes	x 10´`3/ul	20	2.02	1	0.99	-0.05	2.3
Neutrophils	%	20	56.255	0.96	0.997	2.663	-1.1
Neutrophils	x 10´`3/ul	20	3.955	1	0.985	0	0.1
Highest value				1.1579	0.999	2.663	6.9
Lowest Value				0.96	0.86	-28.8421	-5.3

## Sheet: Citrat d to neg. control
Drone							Bland-Altman			Car				Bland-Altman
Analyte	Unit	n	Mean	Slope	r	Intercept	Arithmetic mean %			Analyte	Slope	r	Intercept	Arithmetic mean %
Quick	%	20	109.8	1	0.938	-1	-0.2			Quick	0.985	0.902	1.742	1.3
INR		20	0.969	1	0.938	0	-0.1			INR	0.909	0.902	0.084	-0.8
aPTT	s	20	26.03	0.959	0.932	0.238	-3.8			aPTT	1.025	0.909	-1.779	-5.1
Fibrinogen	g/L	20	2.81	1	0.971	-0.1	-5.9			Fibrinogen	1	0.96	-0.1	-3.4
D-Dimer	ug/L	20	441.3	1.051	0.937	-23.53	-5.5			D-Dimer	1.143	0.916	-77.8	-8
Highest value				1.051	0.971	0.238	-0.1				1.143	0.96	1.742	1.3
Lowest Value				0.959	0.932	-23.53	-5.9				0.909	0.902	-77.8	-8

## Sheet: Citrat Drone compared to Car
							Bland-Altman
Analyte	Unit	n	Mean	Slope	r	Intercept	Arithmetic mean %
Quick	%	20	111.2	1	0.926	-1.5	1.5
INR		20	0.96	1	0.926	0.01	0.7
aPTT	s	20	24.73	0.94444	0.948	1.4806	-1.4
Fibrinogen	g/L	20	2.715	1	0.981	-0.1	2.3
D-Dimer	ug/L	20	420.666	0.9896	0.979	10.8474	-2.7
Highest value				1	0.981	10.8474	2.3				0	0	0	0
Lowest Value				0.94444	0.926	-1.5	-2.7				0	0	0	0

## Sheet: Li-Hep d to neg. control
Drone							Bland-Altman		Car				Bland-Altman
Analyte	Unit	n	Mean	Slope	r	Intercept	Arithmetic mean %		Analyte	Slope	r	Intercept	Arithmetic mean %
Alk. Phos.	U/L	20	62.53	1.055	0.986	-0.5	3.3		Alk. Phos.	1.05	0.983	-0.65	2.8
Billirubin total	umol/L	20	8.33	1	0.972	-0.2	-0.8		Billirubin total	1	0.977	-0.1	-0.3
Calcium	mmol/L	20	2.37	0.953	0.855	0.15	1.7		Calcium	0.888	0.832	0.303	1.8
Cholesterol	mmol/L	20	5.03	1	0.989	0	-0.3		Cholesterol	1	0.994	0	-0.5
Creatine kinase	U/L	20	157.8	1	0.997	-0.5	-0.8		Creatine kinase	1	0.995	-1	-1.2
CRP	mg/L	20	1.81	0.989	0.976	0.037	11.3		CRP	0.988	0.963	0.048	9.7
Protein total	g/L	20	75.26	0.952	0.939	2.928	-1		Protein total	0.938	0.939	3.917	-1.1
Ferritin	ng/mL	20	124.6	1.085	0.989	-0.082	8.8		Ferritin	1.078	0.994	-2.034	7.2
Folate	nmol/L	20	20.38	1.067	0.978	-1.133	-1.7		Folate	0.98	0.952	0.27	-1.5
ƴGT	U/L	20	22.46	1	0.974	1	5.3		ƴGT	1	0.975	1	6.4
Glucose	mmol/L	20	4.51	1.058	0.959	-0.276	-2.3		Glucose	1	0.982	-0.1	-1.7
AST	U/L	20	24.96	1.115	0.888	-2.442	1.2		AST	1.125	0.888	-3.25	-1.1
ALT	U/L	20	26.69	1	0.976	0	0.8		ALT	1	0.966	0	0.4
HDL	mmol/L	20	1.68	0.991	0.997	0.01	0.2		HDL	0.986	0.998	0.022	-0.1
Uric acid	umol/L	20	274.8	1.05	0.983	-6.8	2.1		Uric acid	1.061	0.992	-8.948	2.2
Potassium	mmol/L	20	3.803	1	0.485	0	2.1		Potassium	1	0.545	0	1.8
Creatinine	umol/L	20	70.6	1.09	0.889	1.045	7.8		Creatinine	1.145	0.915	-2.312	8.6
LDH	U/L	20	172.4	1.06	0.889	4.302	9.8		LDH	1	0.963	7	4.4
LDL Cholesterol	mmol/L	20	3.022	0.987	0.982	0.033	0.6		LDL Cholesterol	0.978	0.964	0.071	0.9
Lipase	U/L	20	38.19	1	0.983	0	-0.2		Lipase	1	0.984	0	0
Sodium	mmol/l	20	134.4	0.454	0.752	76.772	3.4		Sodium	0.333	0.724	94.333	2.8
Non - HDL Chol	mmol/l	20	3.355	1.014	0.971	-0.051	-0.6		Non - HDL Chol	1.017	0.981	-0.071	-0.7
Phosphate	mmol/l	20	0.95	1.04	0.984	-0.04	-0.7		Phosphate	1.032	0.965	-0.039	-1.1
Triglyceride	mmol/l	20	1.135	1	0.996	-0.07	-7.6		Triglyceride	1	0.995	-0.07	-7.4
TSH	mU/L	20	1.462	1.065	0.996	0.007	6.6		TSH	1.065	0.994	0.001	6.6
Vitamine B12	pmol/L	20	346.5	1.049	0.995	-6.371	2.6		Vitamine B12	1.024	0.987	3.687	3.4
Highest value
Lowest Value

## Sheet: Li-Hep Drone compared to Car
							Bland-Altman
Analyte	Unit	n	Mean	Slope	r	Intercept	Arithmetic mean %
Alk. Phos.	U/L	20	64.3846	1	0.997	1	-0.5
Billirubin total	umol/L	20	8.3154	1	0.974	-0.5	0.5
Calcium	mmol/L	20	2.41	1.0667	0.945	-0.1643	0.1
Cholesterol	mmol/L	20	5.01	1	0.995	0	-0.2
Creatine kinase	U/L	20	157.346	1	0.996	0	-0.5
CRP	mg/L	20	1.84	1.0051	0.98	0.003133	-2.4
Protein total	g/L	20	74.467	1	0.984	0	-0.1
Ferritin	ng/mL	20	134.608	1.0079	0.991	0.5381	-1.6
Folate	nmol/L	20	20.23	1.0769	0.964	-1.3462	-0.8
ƴGT	U/L	20	23.23	1	0.993	0	1
Glucose	mmol/L	20	4.45	1	0.986	0	0.6
AST	U/L	20	24.8077	1	0.958	1	-2.4
ALT	U/L	20	26.7692	1	0.993	0	-0.5
HDL	mmol/L	20	1.68	1	0.997	0	-0.2
Uric acid	umol/L	20	281.69	0.9879	0.994	3.5931	0.1
Potassium	mmol/L	20	3.869	1	0.964	0	-0.4
Creatinine	umol/L	20	77.15	0.9375	0.972	4.12	0.8
LDH	U/L	20	180	1.0615	0.932	-3.9615	-5.7
LDL Cholesterol	mmol/L	20	3.05	1	0.988	0	0.3
Lipase	U/L	20	38.26	1	0.993	0	0.2
Sodium	mmol/l	20	139.19	1	0.806	0	0.22
Non - HDL Chol	mmol/l	20	3.33	1	0.99	0	-0.1
Phosphate	mmol/l	20	0.9415	1	0.97	0	-0.4
Triglyceride	mmol/l	20	1.0662	1	0.996	0	0.3
TSH	mU/L	20	1.5618	1.0031	0.995	-0.00269	0
Vitamine B12	pmol/L	20	358.23	1.0263	0.985	-12.0526	0.7
Highest value				1.0769	0.997	4.12	1
Lowest Value				0.9375	0.806	-12.0526	-5.7

## Sheet: Temperature
High Altitude (0°C)					Low Altitude (11°C)					Low Altitude (20°C)					Control (4°C)
Altitude (m)	1800				Altitude (m)	600				Altitude (m)	600				Cool Room (°C)	4
Outside Temperature (°C)	0				Outside Temperature (°C)	11				Outside Temperature (°C)	20
Wind (km/h)	8				Wind (km/h)	3				Wind (km/h)	5
Distance travelled (km)	31.8				Distance travelled (km)	29.6				Distance travelled (km)	29.8
Time (min)	Sample Temerature (°C)	Inside Box Temperature (°C)	Outside Box Temperature (°C)		Time (min)	Sample Temerature (°C)	Inside Box Temperature (°C)	Outside Box Temperature (°C)		Time (min)	Sample Temerature (°C)	Inside Box Temperature (°C)	Outside Box Temperature (°C)		Time (min)	Sample Temerature (°C)	Cold Room Temperature (°C)
1	20	20	19		1	23	23	22		1	21	21	21		1	24	4.2
2	19.8	19.6	18.4		2	22.9	22.8	21.7		2	21	21	21		2	23.2	4.2
3	19.6	19.3	17.8		3	22.7	22.6	21.3		3	21	21	21		3	22.4	4.2
4	19.4	18.9	17.2		4	22.6	22.3	21		4	21	21	21		4	21.6	4.2
5	19.2	18.5667	16.6		5	22.4333	22.5	20.6		5	21	21	20.9		5	20.8	4.1
6	19	18.2167	16		6	22.2833	22.2	20.3		6	21	21	20.9		6	20	4.1
7	18.8	17.8667	15.4		7	22.1333	22	19.9		7	21	21	20.9		7	19.2	4.1
8	18.6	17.5167	14.8		8	21.9833	21.7	19.5		8	20.9	21.9	20.9		8	18.4	4.1
9	18.4	17.1667	14.2		9	21.8333	22.5	19.1		9	20.9	21.9	20.8		9	17.8	4.1
10	18.2	16.8	13.6		10	21.6833	22.2	18.8		10	20.9	21.9	20.8		10	17.2	4.1
11	18	16.4	13		11	21.5333	22	18.5		11	20.9	21.9	20.8		11	16.6	4.1
12	17.8	16.0222	12.5		12	21.3833	21.8	18.2		12	20.9	21.8	20.8		12	16	4.1
13	17.7	15.6389	12		13	21.2333	21.6	17.9		13	20.9	21.8	20.7		13	15.4	4.1
14	17.6	15.2556	11.5		14	21.0833	21.4	17.6		14	20.8	21.8	20.7		14	14.8	4.1
15	17.5	14.8722	11		15	20.9333	21.1	17.3		15	20.8	21.8	20.7		15	14.2	4.1
16	17.3	14.4889	10.5		16	20.7833	20.8	17		16	20.8	21.8	20.6		16	13.6	4
17	17.2	14.1056	10		17	20.6333	20.5	16.7		17	20.8	21.7	20.6		17	13	4
18	17.1	13.7222	9.5		18	20.4833	20.2	16.4		18	20.8	21.7	20.6		18	12.5	4
19	17	13.3389	9		19	20.3333	19.9	16.1		19	20.8	21.7	20.6		19	12	4
20	16.8	12.9556	8.5		20	20.1833	19.7	15.8		20	20.8	21.7	20.5		20	11.5	4
21	16.7	12.5722	8		21	20.0333	19.5	15.5		21	20.8	21.6	20.5		21	11	4
22	16.6	12.1889	7.5		22	19.8833	19.3	15.2		22	20.7	21.6	20.5		22	10.5	4
23	16.4	11.8056	7		23	19.7333	19.1	14.9		23	20.7	21.6	20.4		23	10	4
24	16.5	11.4222	6.5		24	19.5833	18.9	14.6		24	20.7	21.6	20.4		24	9.5	4
25	16.4	11.0389	6.1		25	19.5	18.7	14.3		25	20.7	21.5	20.4		25	9.1	4
26	16.2	10.6556	5.7		26	19.4	18.5	14		26	20.7	21.5	20.3		26	8.7	4
27	16.1	10.2722	5.3		27	19.3	18.3	13.8		27	20.7	21.5	20.3		27	8	4
28	16	9.88889	5		28	19.2	18	13.6		28	20.6	21.5	20.3		28	7.4	4
29	15.8	9.50556	4.8		29	19.1	17.7	13.4		29	20.6	20.4	20.2		29	6.8	4
30	15.7	9.12222	4.6		30	19	17.4	13.1		30	20.6	20.4	20.1		30	6.2	4
Difference Start to End	4.3					4					0.4					17.8

## Sheet: Vibration
Combustion Car			Electric Car		Drone
Time	Vibration (m/s^2)		Vibration (m/s^2)		Vibration (m/s^2)
00:00:00	0.01		0.05		0.02
00:00:10	0.01		0.1		0.02
00:00:20	0.1		0.11		0.03
00:00:30	0.2		0.1		0.85
00:00:40	0.62		0.2		0.8
00:00:50	0.58		0.45		4.95
00:01:00	0.61		0.43		4.23
00:01:10	0.59		0.55		4.25
00:01:20	1.06		0.42		4.5
00:01:30	0.97		0.53		5.65
00:01:40	0.56		0.62		4.86
00:01:50	0.65		0.38		4.7
00:02:00	0.52		0.48		4.23
00:02:10	0.47		0.36		2.89
00:02:20	0.45		0.75		2.52
00:02:30	0.49		0.7		3.13
00:02:40	0.89		0.58		2.89
00:02:50	0.74		0.62		2.75
00:03:00	0.58		0.61		2.77
00:03:10	0.49		0.58		2.63
00:03:20	1.3		0.6		2.96
00:03:30	0.77		0.62		3.25
00:03:40	1.01		0.63		3.3
00:03:50	1.02		0.66		2.74
00:04:00	1		0.58		2.02
00:04:10	1.2		0.66		3.5
00:04:20	1.18		0.8		2.65
00:04:30	1.19		0.86		2.45
00:04:40	1.18		0.85		2.89
00:04:50	1.2		0.77		3.05
00:05:00	1.12		0.81		3.12
00:05:10	1.08		0.9		2.58
00:05:20	1.18		0.89		2.47
00:05:30	0.9		1.53		2.31
00:05:40	0.98		1.61		2.58
00:05:50	1.02		1.35		2.47
00:06:00	1.78		1.23		2.55
00:06:10	0.65		1.45		3
00:06:20	0.6		1.42		3.03
00:06:30	0.58		1.19		3.14
00:06:40	0.62		1.52		2.75
00:06:50	0.38		1.1		2.48
00:07:00	0.2		1.65		2.64
00:07:10	0.42		2.5		2.98
00:07:20	1.4		0.9		2.41
00:07:30	1		0.71		2.98
00:07:40	0.4		0.69		3.15
00:07:50	0.45		0.5		3.26
00:08:00	1.2		0.68		3.4
00:08:10	1.8		0.71		3.1
00:08:20	0.34		0.98		2.99
00:08:30	0.36		1.42		2.93
00:08:40	0.43		1.83		2.84
00:08:50	0.59		2.54		2.56
00:09:00	0.5		2.21		2.34
00:09:10	0.48		1.76		2.78
00:09:20	0.58		1.68		2.49
00:09:30	0.65		1.62		2.63
00:09:40	0.55		1.71		3.2
00:09:50	0.78		1.67		3.21
00:10:00	1.32		1.81		3.65
00:10:10	1		1.52		3.02
00:10:20	1.03		1.59		3.1
00:10:30	1		1.93		3.45
00:10:40	1.15		1.9		2.89
00:10:50	1.11		1.1		2.98
00:11:00	1.15		1.23		2.65
00:11:10	1.2		1.56		2.48
00:11:20	1.18		0.68		2.65
00:11:30	1.38		0.69		2.98
00:11:40	1.2		0.55		2.54
00:11:50	1.5		0.42		2.65
00:12:00	0.7		0.89		2.48
00:12:10	0.67		0.74		2.66
00:12:20	0.68		0.71		2.48
00:12:30	0.68		0.65		3.15
00:12:40	0.7		0.68		4.31
00:12:50	0.86		0.59		4.42
00:13:00	0.69		0.51		4.55
00:13:10	0.48		0.39		5.6
00:13:20	0.56		0.79		5.11
00:13:30	0.49		0.58		6.02
00:13:40	0.9		0.81		4.48
00:13:50	0.71		1.1		4.62
00:14:00	0.87		0.87		4.79
00:14:10	0.58		0.62		4.45
00:14:20	0.59		0.58		4.89
00:14:30	0.38		0.32		5.23
00:14:40	0.12		0.48		1.13
00:14:50	0.13		0.1		0.02
00:15:00	0.01		0.05		0.02
00:15:10	0.01		0.06		0.03
